# Supplementary material for: Phase-dependent photocatalytic H2evolution of copper zinc tin sulfide under visible light
Source: Royal Society of Chemistry journal article supplement (doi:10.1039/c4cc05654j), 2014-09-02
Supplement: c4cc05654j1.pdf [file c4cc05654j1.pdf]

*Supporting information for*

**Phase-dependent photocatalytic H<sub>2</sub> evolution of Copper Zinc Tin  
Sulfide under visible light**

Zhi-Xian Chang,<sup>a,b</sup> Wen-Hui Zhou,<sup>a\*</sup> Dong-Xing Kou,<sup>a</sup> Zheng-Ji Zhou,<sup>a</sup>  
and Si-Xin Wu<sup>a\*</sup>

<sup>a</sup> *The Key Laboratory for Special Functional Materials of MOE, Henan University, Kaifeng  
475004, China.*

<sup>b</sup> *Institute of Environmental and Analytical Sciences, College of Chemistry and Chemical  
Engineering, Henan University, Kaifeng 475004, China.*

\*Corresponding author. Tel/fax number: +86-371-23881358;

E-mail: zhouwh@henu.edu.cn and wusixin@henu.edu.cn

## **Experimental Details**

### **Chemicals.**

Cu(acac)<sub>2</sub>, Zn(OAc)<sub>2</sub>, Sn(OAc)<sub>4</sub> and 1-dodecanethiol (DDT) were purchased from Alfa and were used as received. All the other reagents were analytical grade.

### **Synthesis of WZ CZTS nanospindles.**

Typically, 1.332 mmol of Cu(acac)<sub>2</sub>, 0.915 mmol of Zn(OAc)<sub>2</sub>, and 0.75 mmol of Sn(OAc)<sub>4</sub> were sonically dissolved in 25 mL of 1-dodecanethiol (DDT) to produce homogenous precursor solution. Then, the solution was transferred on preheated oil-bath at 235 °C and maintained for 4 hours. After being cooled down room temperature, WZ CZTS were precipitated by ethanol. The particles were washed with 1:1 hexane/ethanol at least 5 times, followed by being dried in vacuum overnight.

### **Phase-compositional CZTS.**

The WZ CZTS nanospindles were first thermally treated at 350°C in air for 3 min. This sample was marked as CZTS350. To obtain the samples with different phase-compositional CZTS, the CZTS350 particles were annealed at 450, 500 and 550 °C for 15 min, respectively, with elemental sulfur in Ar gas. The received samples were marked as CZTS450, CZTS500 and CZTS550.

### **Characterizations.**

The crystallographic phases of the samples were performed on a D8 Advance X-ray powder diffraction (Germany, Bruck), with diffraction angle  $2\theta$  ranging from 10 to 90°. Transmission electron microscopy (TEM) and High-resolution TEM (HRTEM) were recorded on a JEOL JEM-2010 TEM (Japan) with the accelerating voltage of 200 kV. The ratio of metal elements was analyzed by an Inductively Coupled Plasma-Atomic Emission Spectrometer (Optima DV2100, PerkinElmer, USA). Raman spectrum was performed using a LabRAM-1B confocal laser Raman spectrometer with an excitation wavelength of 632.5 nm. UV-vis spectra were obtained using a

UV-vis spectrometer (Lambda 950, PerkinElmer, USA).

Photocatalytic reactions were conducted at 25 °C in a gas-closed circulation and evacuation system with a Pyrex cell connected to water bath. A 300 W top-irradiated Xenon lamp was used as light source. Prior to the photocatalytic reaction, 0.5 wt % Pt was loaded by photodeposition method in situ, using  $\text{H}_2\text{PtCl}_6$  as reagent. Approximately 0.040 g CZTS was magnetically stirred in the reaction chamber containing 100 mL of  $\text{Na}_2\text{S}$  ( $0.4 \text{ mol}\cdot\text{L}^{-1}$ ) and  $\text{Na}_2\text{SO}_3$  ( $0.3 \text{ mol}\cdot\text{L}^{-1}$ ) aqueous solution. The irradiation was visible light ( $\lambda \geq 420 \text{ nm}$ ) using a cut-off filter from 300 W Xenon lamp. The amounts of evolved  $\text{H}_2$  were determined using gas chromatography (Agilent 7890A, thermal conductivity detector, and argon carrier).

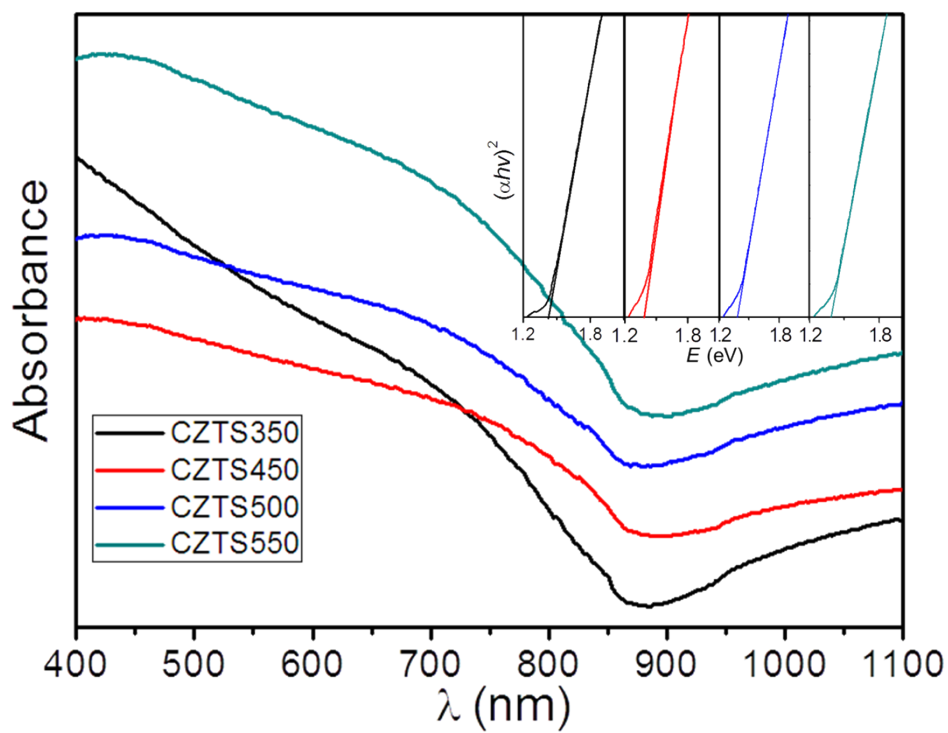

**Fig. S1** UV-vis spectra of CZTS samples. The inset is the linear extrapolation of  $(\alpha h\nu)^2$  versus photo energy  $E$  (eV).

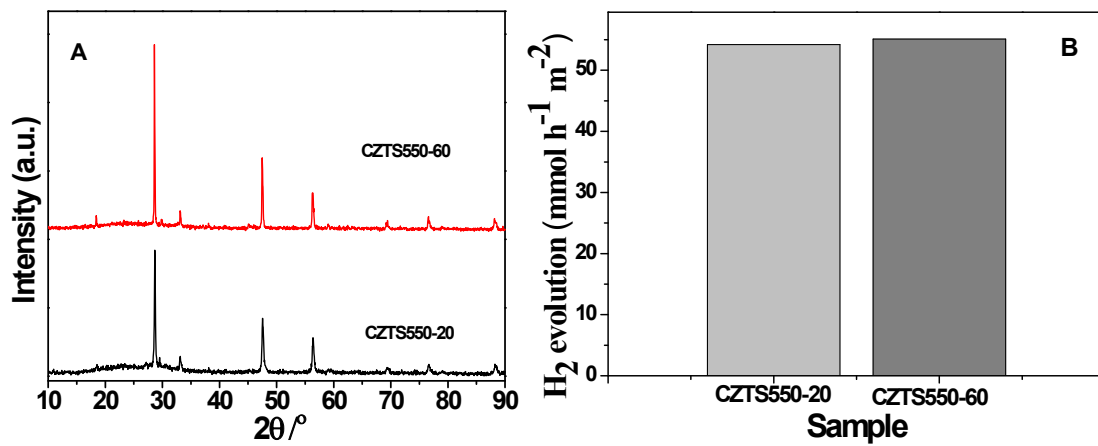

Fig. S2 The XRD patterns (A) and  $H_2$  evolution rates (B) for kesterite CZTS with different crystallinity.

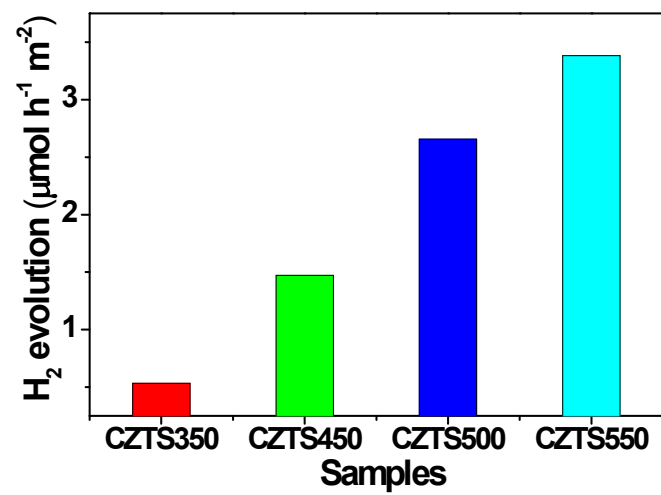

Fig. S3 The normalized H<sub>2</sub> evolution rates of various annealed CZTS to surface area.
